# Supplementary material
Source: Springer Nature journal article supplement (https://www.springermedizin.de/resource/supplementary/12913_2009_1313_MOESM2_ESM.pdf/9527838)

**a.**

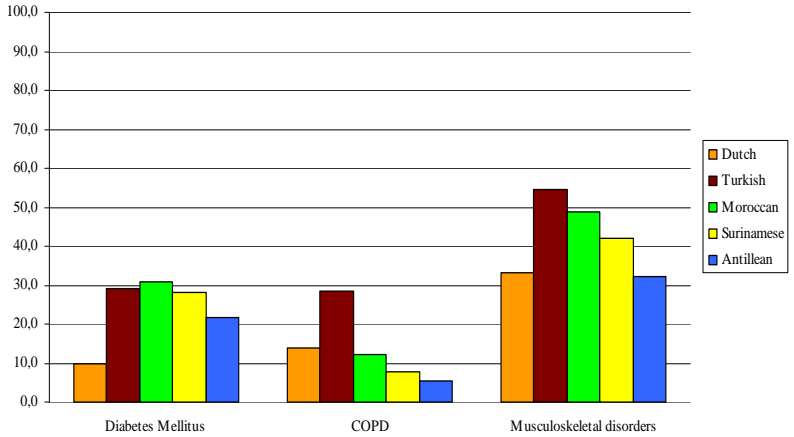

**b.**

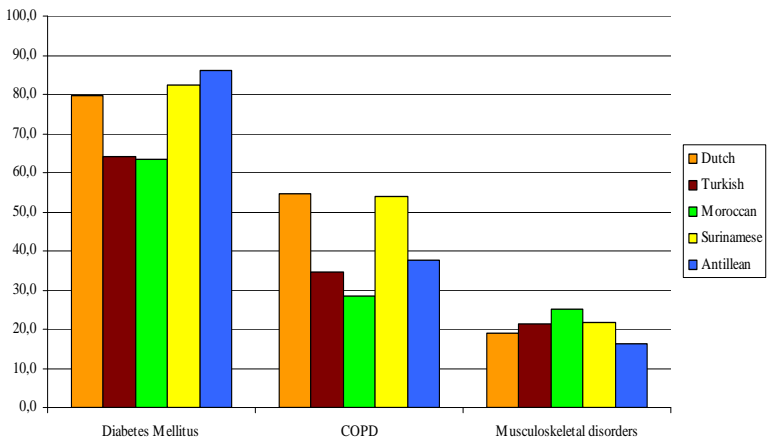

Supplement: MOESM2 [file 9527838]
